# Supplementary material for: Effect of Lifestyle Factors on Hypertension by Constitution Type: A Large Community-Based Study
Source: Hindawi journal article supplement (doi:10.1155/2019/3231628), 2019-12-04
Supplement: f1 [file 3231628.f1.pdf]

Supplementary material

Table S1. Odds ratios for hypertension by three levels of lifestyle factors for each Sasang constitution type (A), and by Sasang constitution type with each lifestyle pattern (B).

(A)

|                                     | So-Eum             | So-Yang              | Tae-Eum                        | Total                |
|-------------------------------------|--------------------|----------------------|--------------------------------|----------------------|
| Unhealthy lifestyle<br>(0–1 points) | 1.00               | 1.00                 | 1.00                           | 1.00                 |
| Average lifestyle<br>(2–3 points)   | 0.37* (0.17, 0.81) | 0.59** (0.41, 0.86)  | 0.84 <sup>†</sup> (0.68, 1.03) | 0.64*** (0.54, 0.77) |
| Healthy lifestyle<br>(4–5 points)   | 0.41* (0.19, 0.94) | 0.45*** (0.30, 0.68) | 0.62** (0.48, 0.82)            | 0.42*** (0.34, 0.51) |

<sup>†</sup>: p<0.1, \*: p<0.05, \*\*: p<0.01, \*\*\*: p<0.001.

(B)

|                                     | So-Eum |             | So-Yang |                      | Tae-Eum |                      |
|-------------------------------------|--------|-------------|---------|----------------------|---------|----------------------|
|                                     | N      | OR (95% CI) | N       | OR (95% CI)          | N       | OR (95% CI)          |
| Unhealthy lifestyle<br>(0–1 points) | 32     | 1.00        | 153     | 1.29 (0.59, 2.87)    | 536     | 1.78 (0.86, 3.78)    |
| Average lifestyle<br>(2–3 points)   | 432    | 1.00        | 775     | 1.77*** (1.37, 2.29) | 2,190   | 3.13*** (2.49, 3.96) |
| Healthy lifestyle<br>(4–5 points)   | 540    | 1.00        | 541     | 2.21 (0.92, 1.59)    | 593     | 2.07*** (1.60, 2.69) |

\*\*\*: p<0.001. OR: odds ratio.
